# Supplementary material for: Changes in Gut Bacterial Translation Occur before Symptom Onset and Dysbiosis in Dextran Sodium Sulfate-Induced Murine Colitis
Source: PubMed Central journal article supplement (PMC8651081; doi:10.1128/msystems.00507-21), 2021-12-07
Supplement: msystems.00507-21-sf001.pdf [file msystems.00507-21-sf001.pdf]

**A**

| Day                  | -3 | -2 | -1 | 0 | 1 | 2 | 3 | 4 | 5 | 6 | 7 | 8 | 9 | 10 | 17 | 21 |
|----------------------|----|----|----|---|---|---|---|---|---|---|---|---|---|----|----|----|
| Body weight          | •  | •  | •  | ✓ | ✓ | ✓ | ✓ | ✓ | ✓ | ✓ | ✓ | ✓ | ✓ | ✓  |    |    |
| LCN-2                | •  | •  | •  | • | • | • | • | • | • | • | • | • | • | •  |    |    |
| Blood in stool       |    |    |    |   | ✓ | ✓ | ✓ | ✓ | ✓ | ✓ | ✓ | ✓ | ✓ | ✓  |    |    |
| % HNA, LNA, PI       | ○  | •  | •  | • | • | ✓ | ✓ | ✓ | ✓ | ✓ | ✓ | ✓ | ✓ | ✓  | •  | •  |
| % BONCAT             | ○  | •  | ○  | • | ○ | ○ | ✓ | ✓ | ✓ | ✓ | ✓ | ○ | ○ | ✓  | ✓  | ✓  |
| 16S whole community  | ○  | •  | •  | • | ○ | ○ | ✓ | ✓ | ✓ | ✓ | ✓ |   |   | ✓  |    |    |
| 16S BONCAT           | ○  | •  | ○  | • | ○ | ○ | ✓ | ✓ | ✓ | ✓ | ✓ | ○ | ○ | ✓  | •  | •  |
| 16S sorted fractions | ○  | •  | •  | • | ○ | ○ | • | • | ✓ | ✓ | ✓ | ○ | ○ | ✓  | •  | •  |

**B**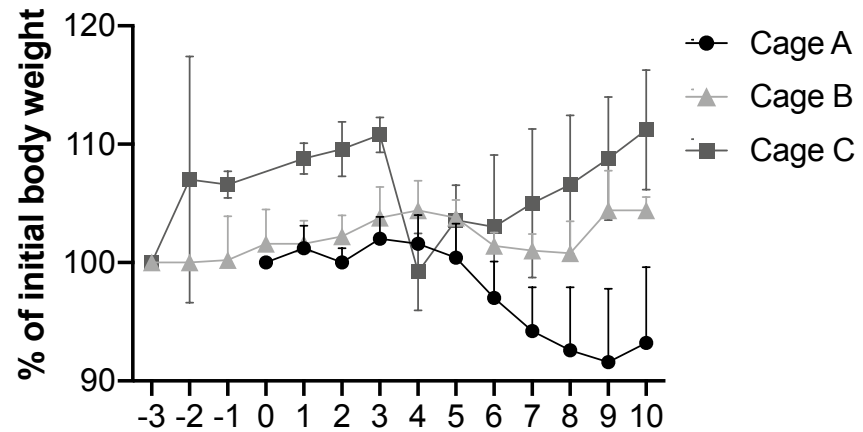**C**

| Cage     | Mouse | Day |   |   |   |   |   |   |   |   |    |    |    |  |  |  |
|----------|-------|-----|---|---|---|---|---|---|---|---|----|----|----|--|--|--|
|          |       | 1   | 2 | 3 | 4 | 5 | 6 | 7 | 8 | 9 | 10 | 11 | 12 |  |  |  |
| <b>A</b> | M1    | +   | + |   |   |   | + | + | + | + |    |    |    |  |  |  |
|          | M3    |     |   | + |   | + | + | + |   | + |    |    |    |  |  |  |
|          | M5    |     |   |   | + |   | + | + | ~ |   |    |    |    |  |  |  |
|          | M7    |     |   |   |   |   | + | + | + |   | +  | +  |    |  |  |  |
|          | M9    |     |   |   |   |   |   |   |   |   |    |    |    |  |  |  |
| <b>B</b> | M2    |     |   | + | + | + | + | ~ |   |   |    |    |    |  |  |  |
|          | M4    |     |   | + | + | + | + | ~ |   |   |    |    |    |  |  |  |
|          | M6    |     |   |   | + | + | + | + |   |   |    |    |    |  |  |  |
|          | M8    |     |   |   | + | + | + | + |   |   |    |    |    |  |  |  |
|          | M10   |     |   |   | + | + | + | ~ |   |   |    |    |    |  |  |  |
| <b>C</b> | M11   |     |   |   | + | + | + | + | ~ |   |    |    |    |  |  |  |
|          | M13   |     |   |   |   | + | + | + |   |   |    |    |    |  |  |  |
|          | M15   |     |   |   | + | + | + |   |   |   |    |    |    |  |  |  |
|          | M17   |     |   |   | + | + | + |   |   |   |    |    |    |  |  |  |
|          | M19   |     |   | + | + | + | ~ |   |   |   |    |    |    |  |  |  |

+ = positive for blood in stool

~ = inconclusive
