# Supplementary material for: Changes in Gut Bacterial Translation Occur before Symptom Onset and Dysbiosis in Dextran Sodium Sulfate-Induced Murine Colitis
Source: PubMed Central journal article supplement (PMC8651081; doi:10.1128/msystems.00507-21), 2021-12-07

**A**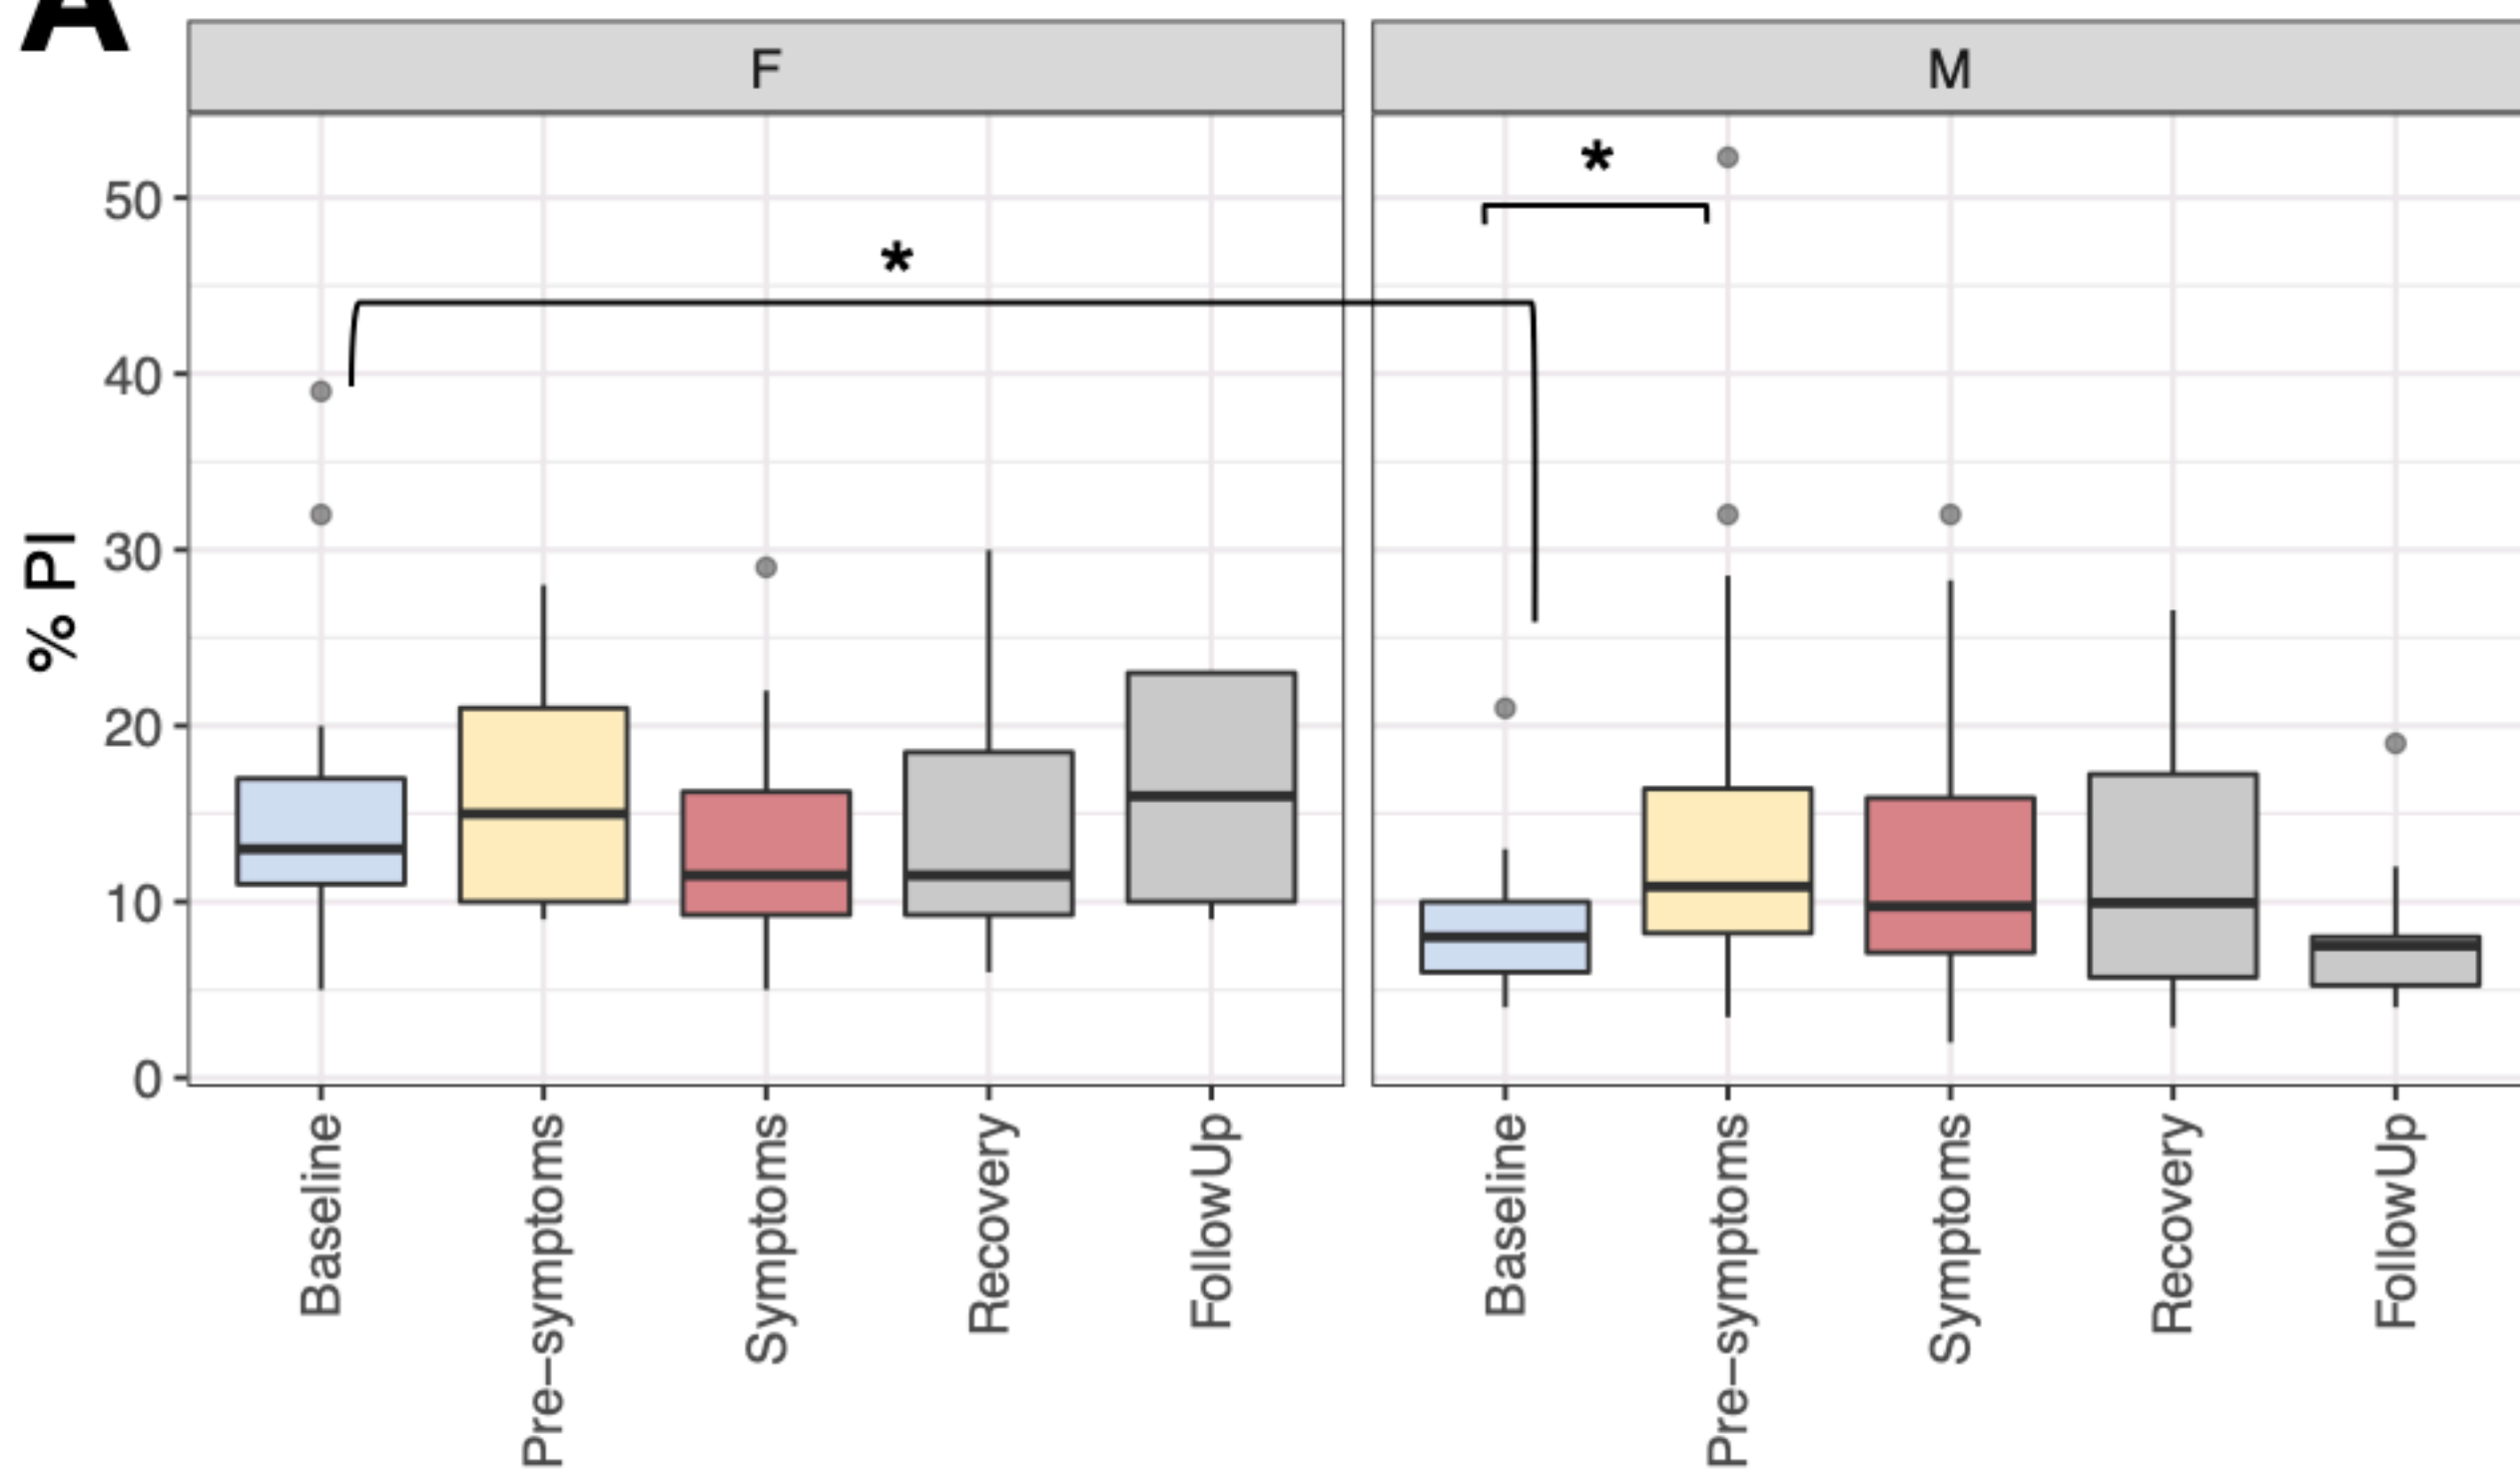**B**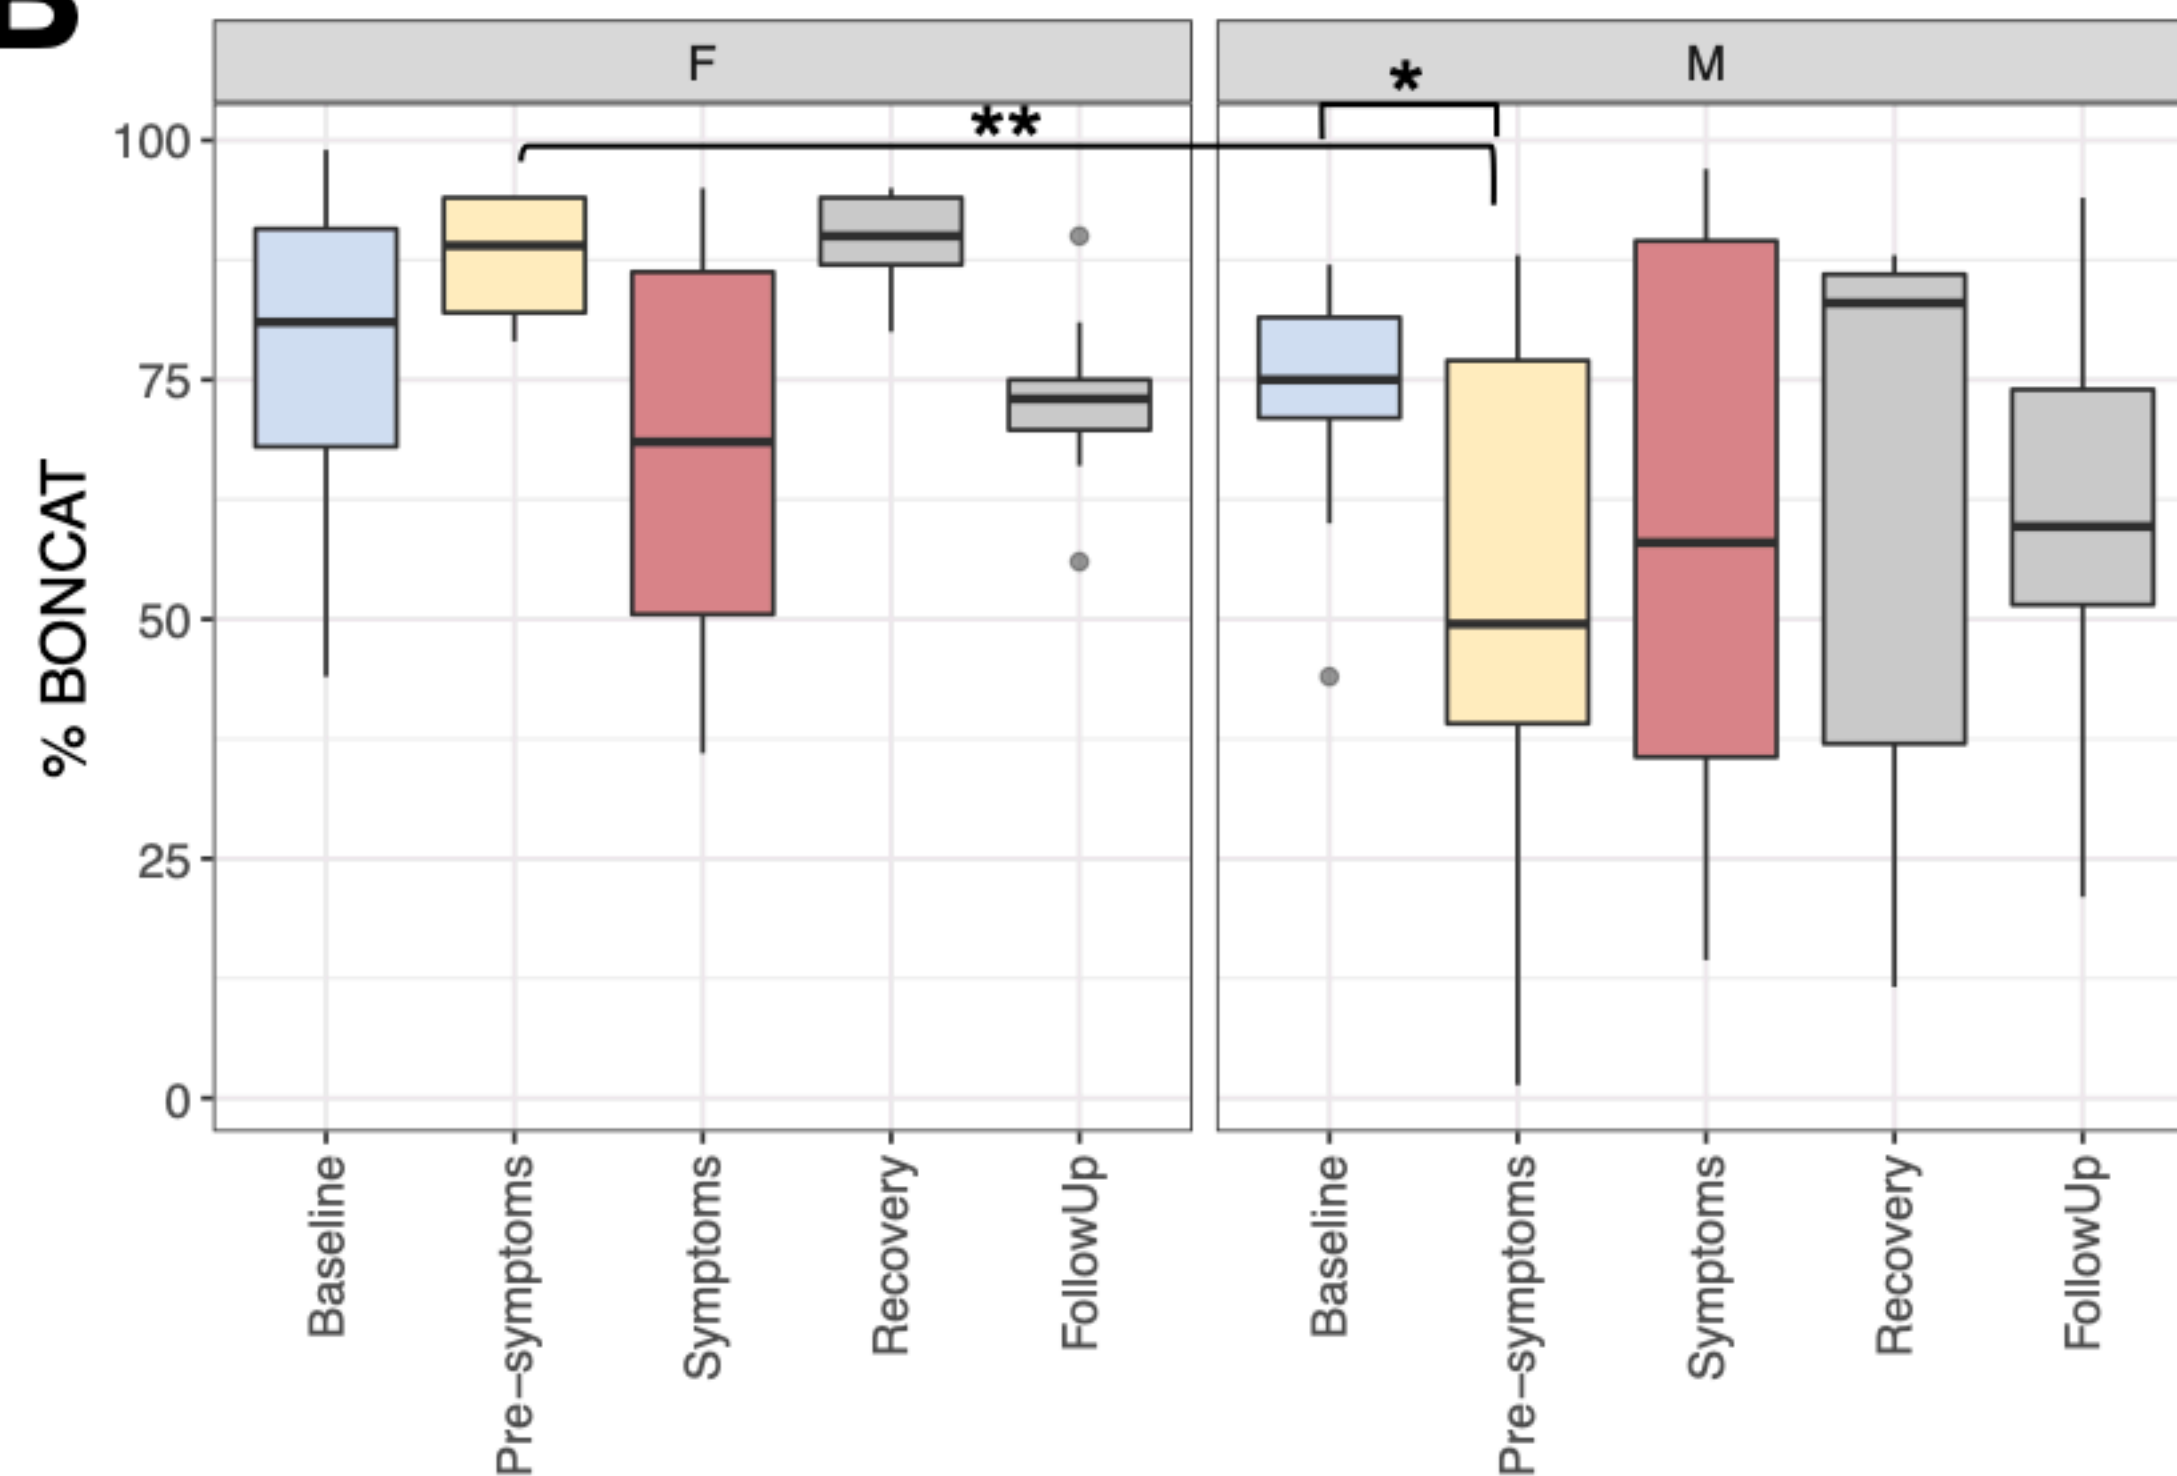**C**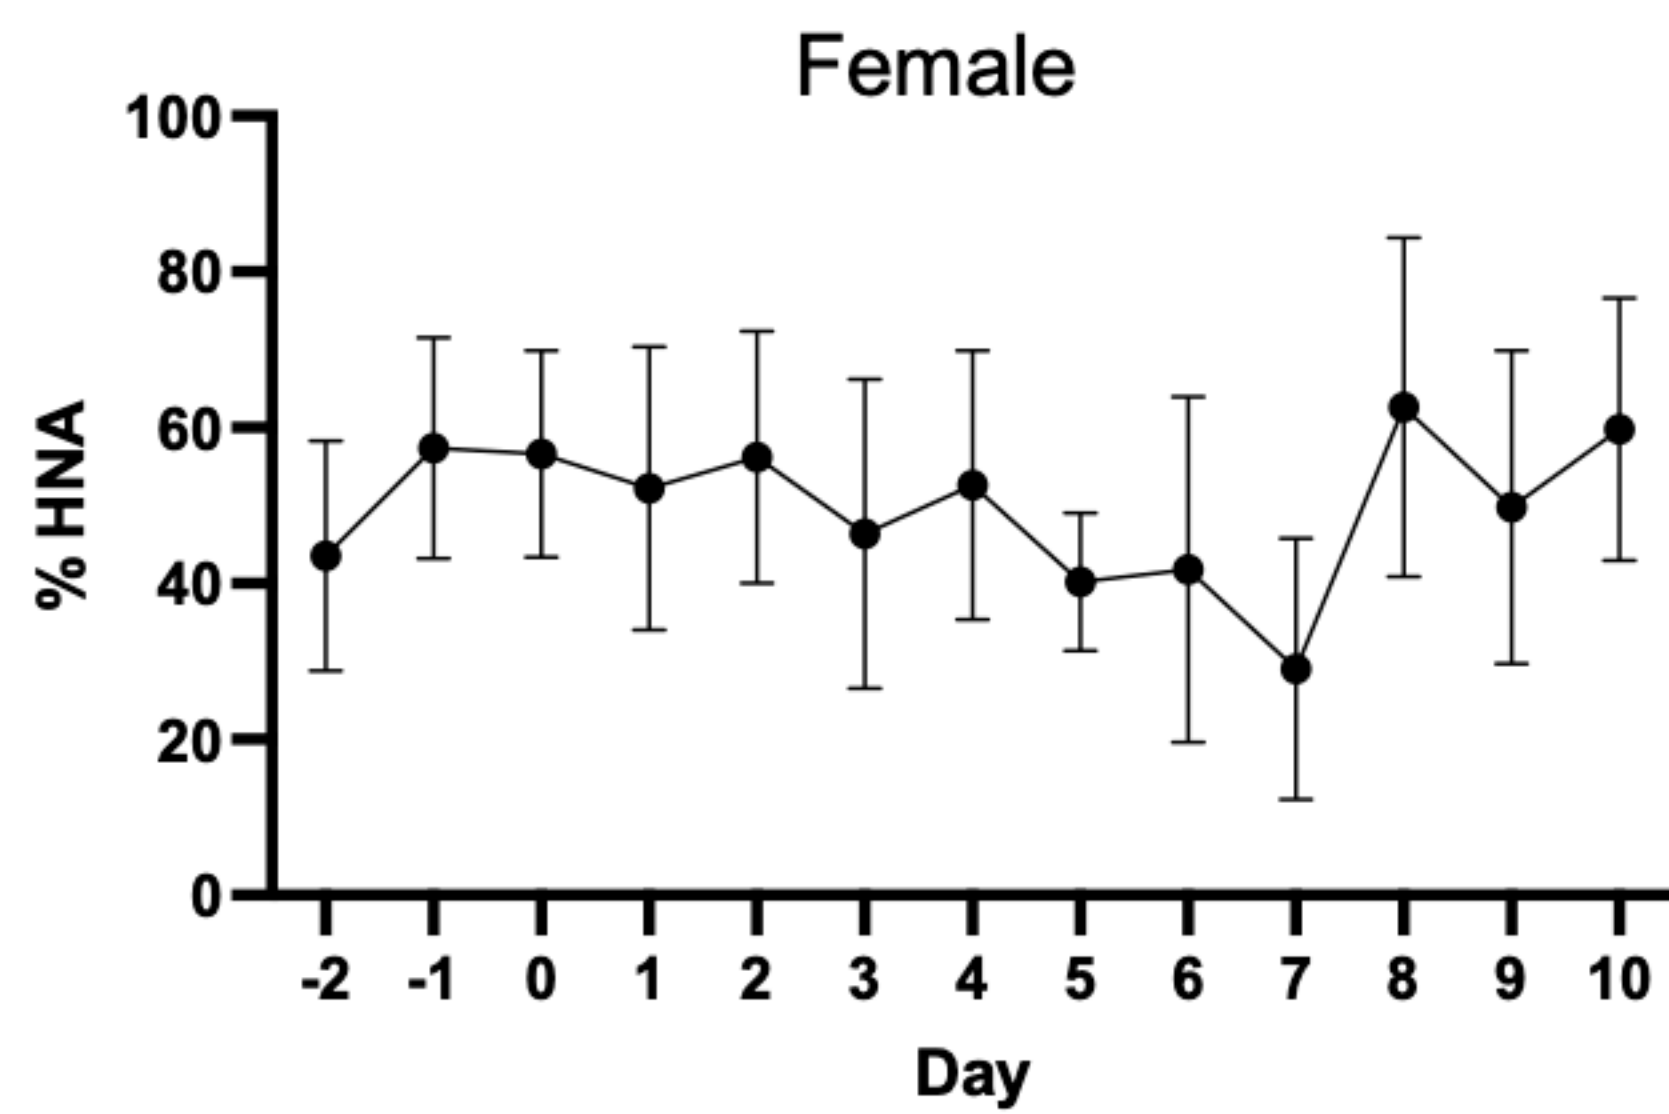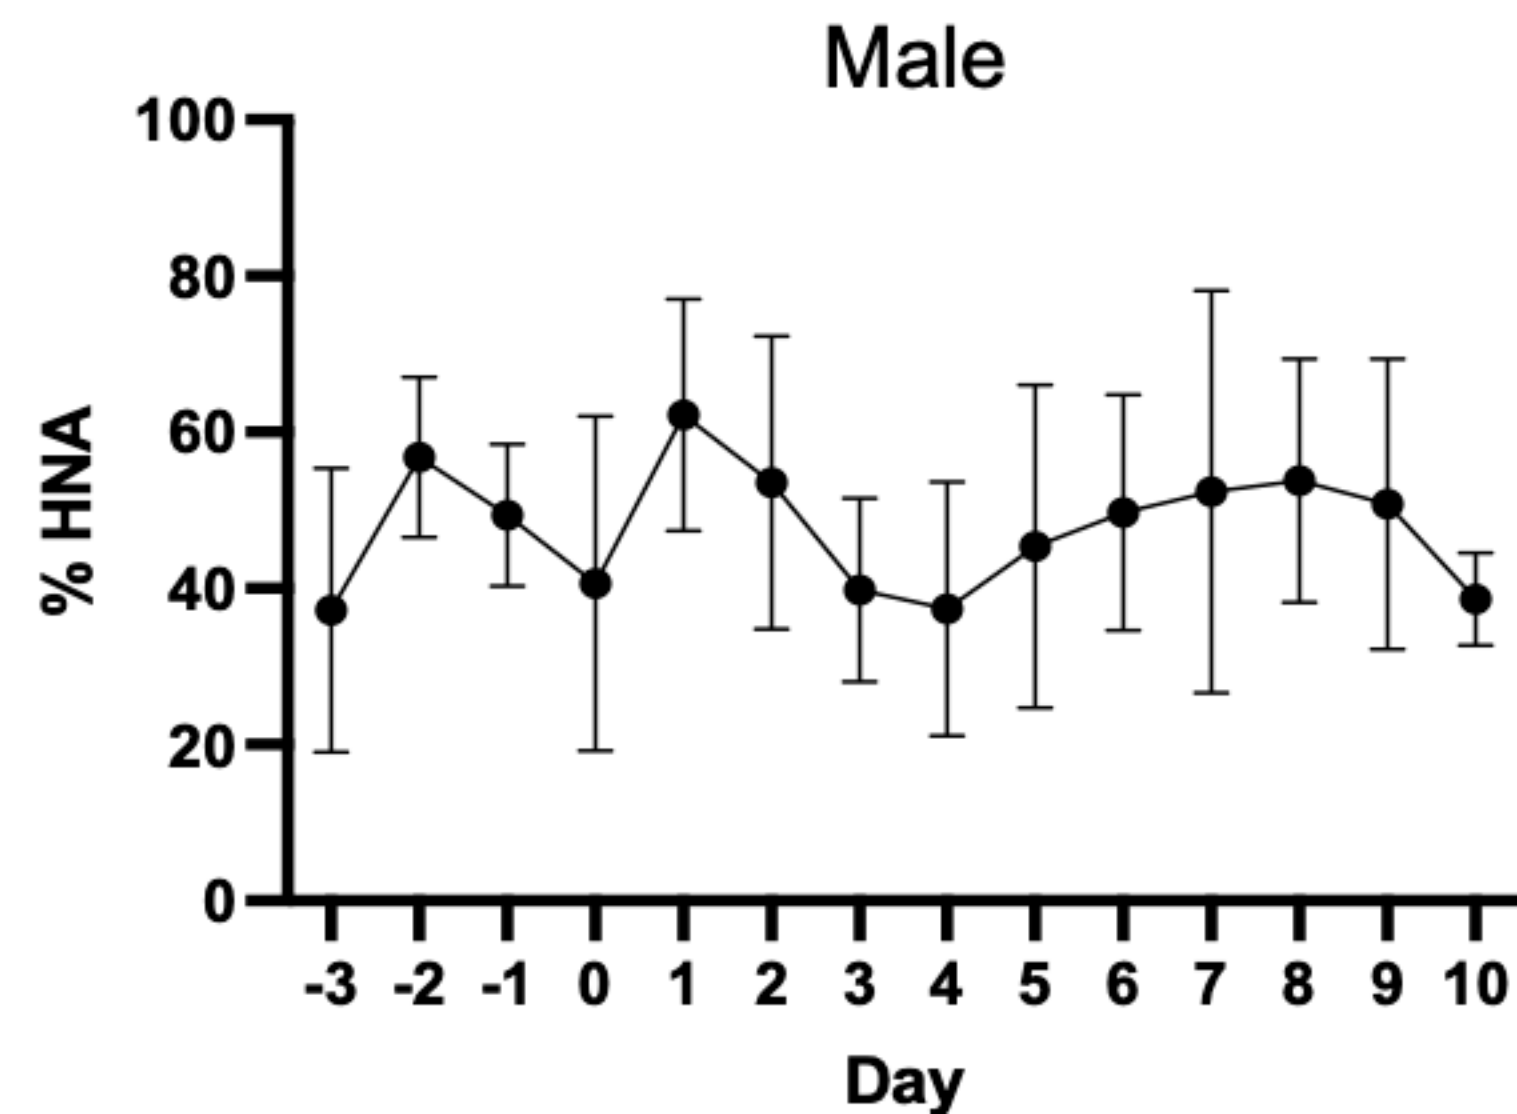

Supplement: msystems.00507-21-sf002.pdf [file msystems.00507-21-sf002.pdf]
