# Supplementary material for: Changes in Gut Bacterial Translation Occur before Symptom Onset and Dysbiosis in Dextran Sodium Sulfate-Induced Murine Colitis
Source: PubMed Central journal article supplement (PMC8651081; doi:10.1128/msystems.00507-21), 2021-12-07

A

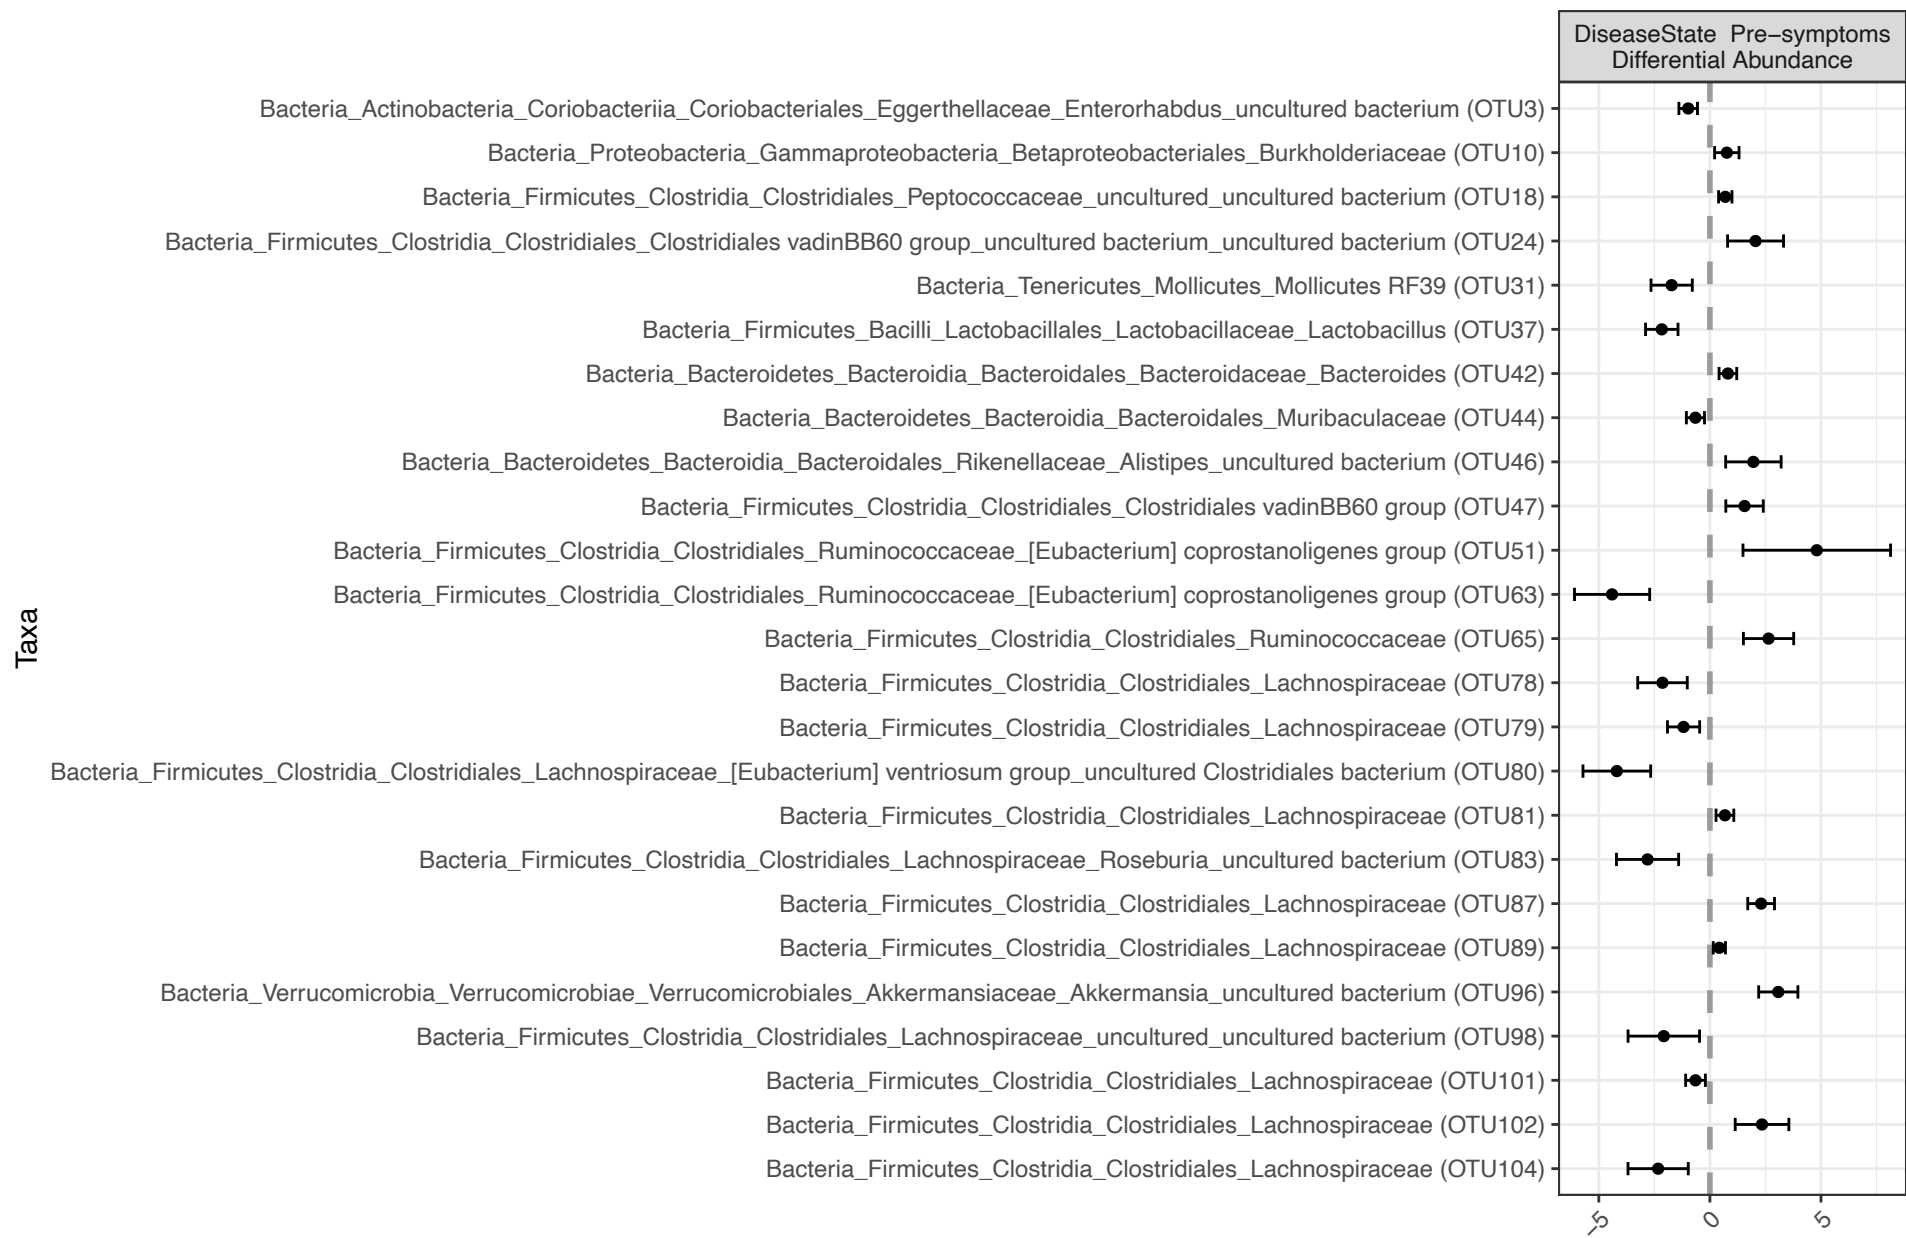

**B**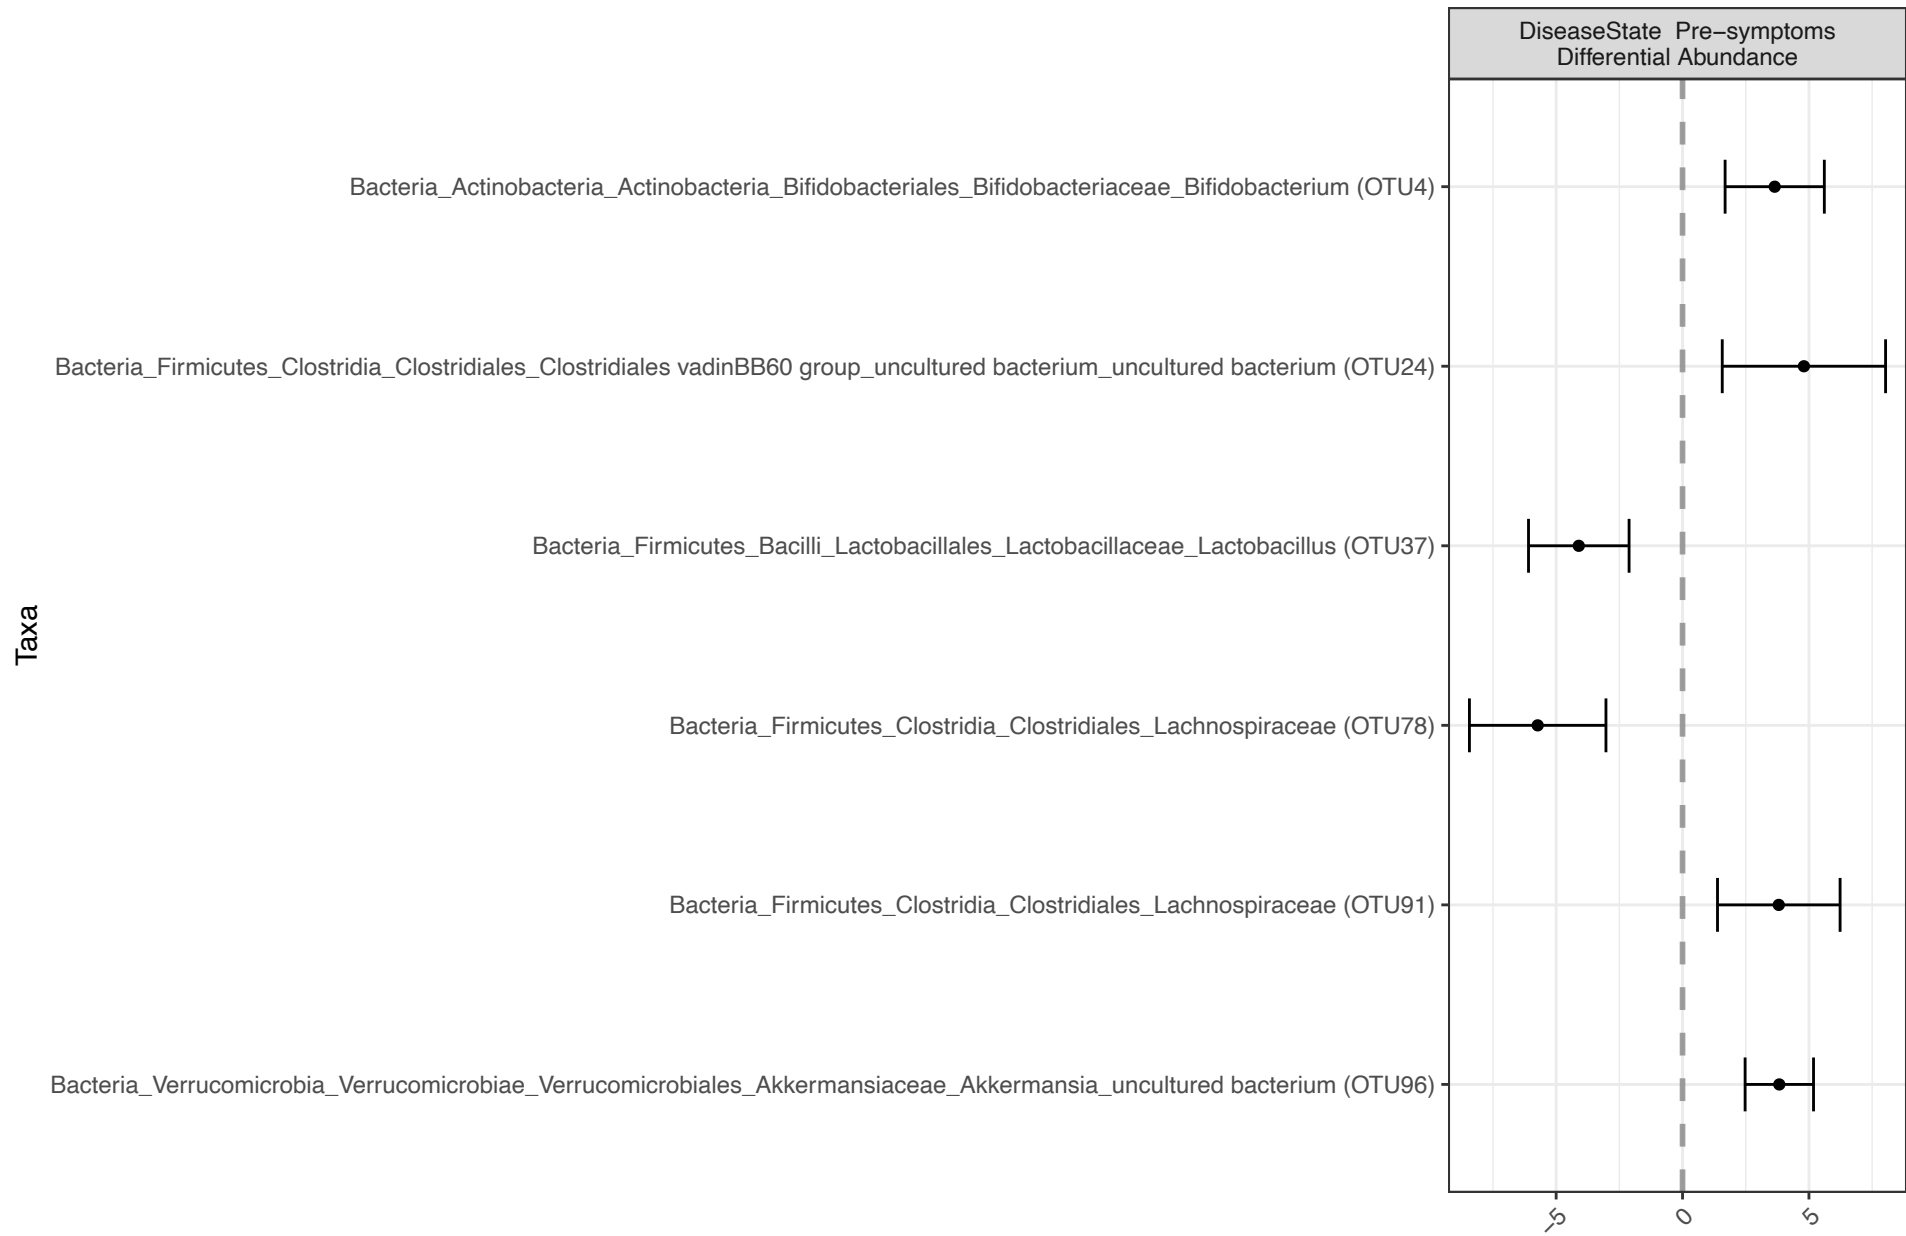

**C**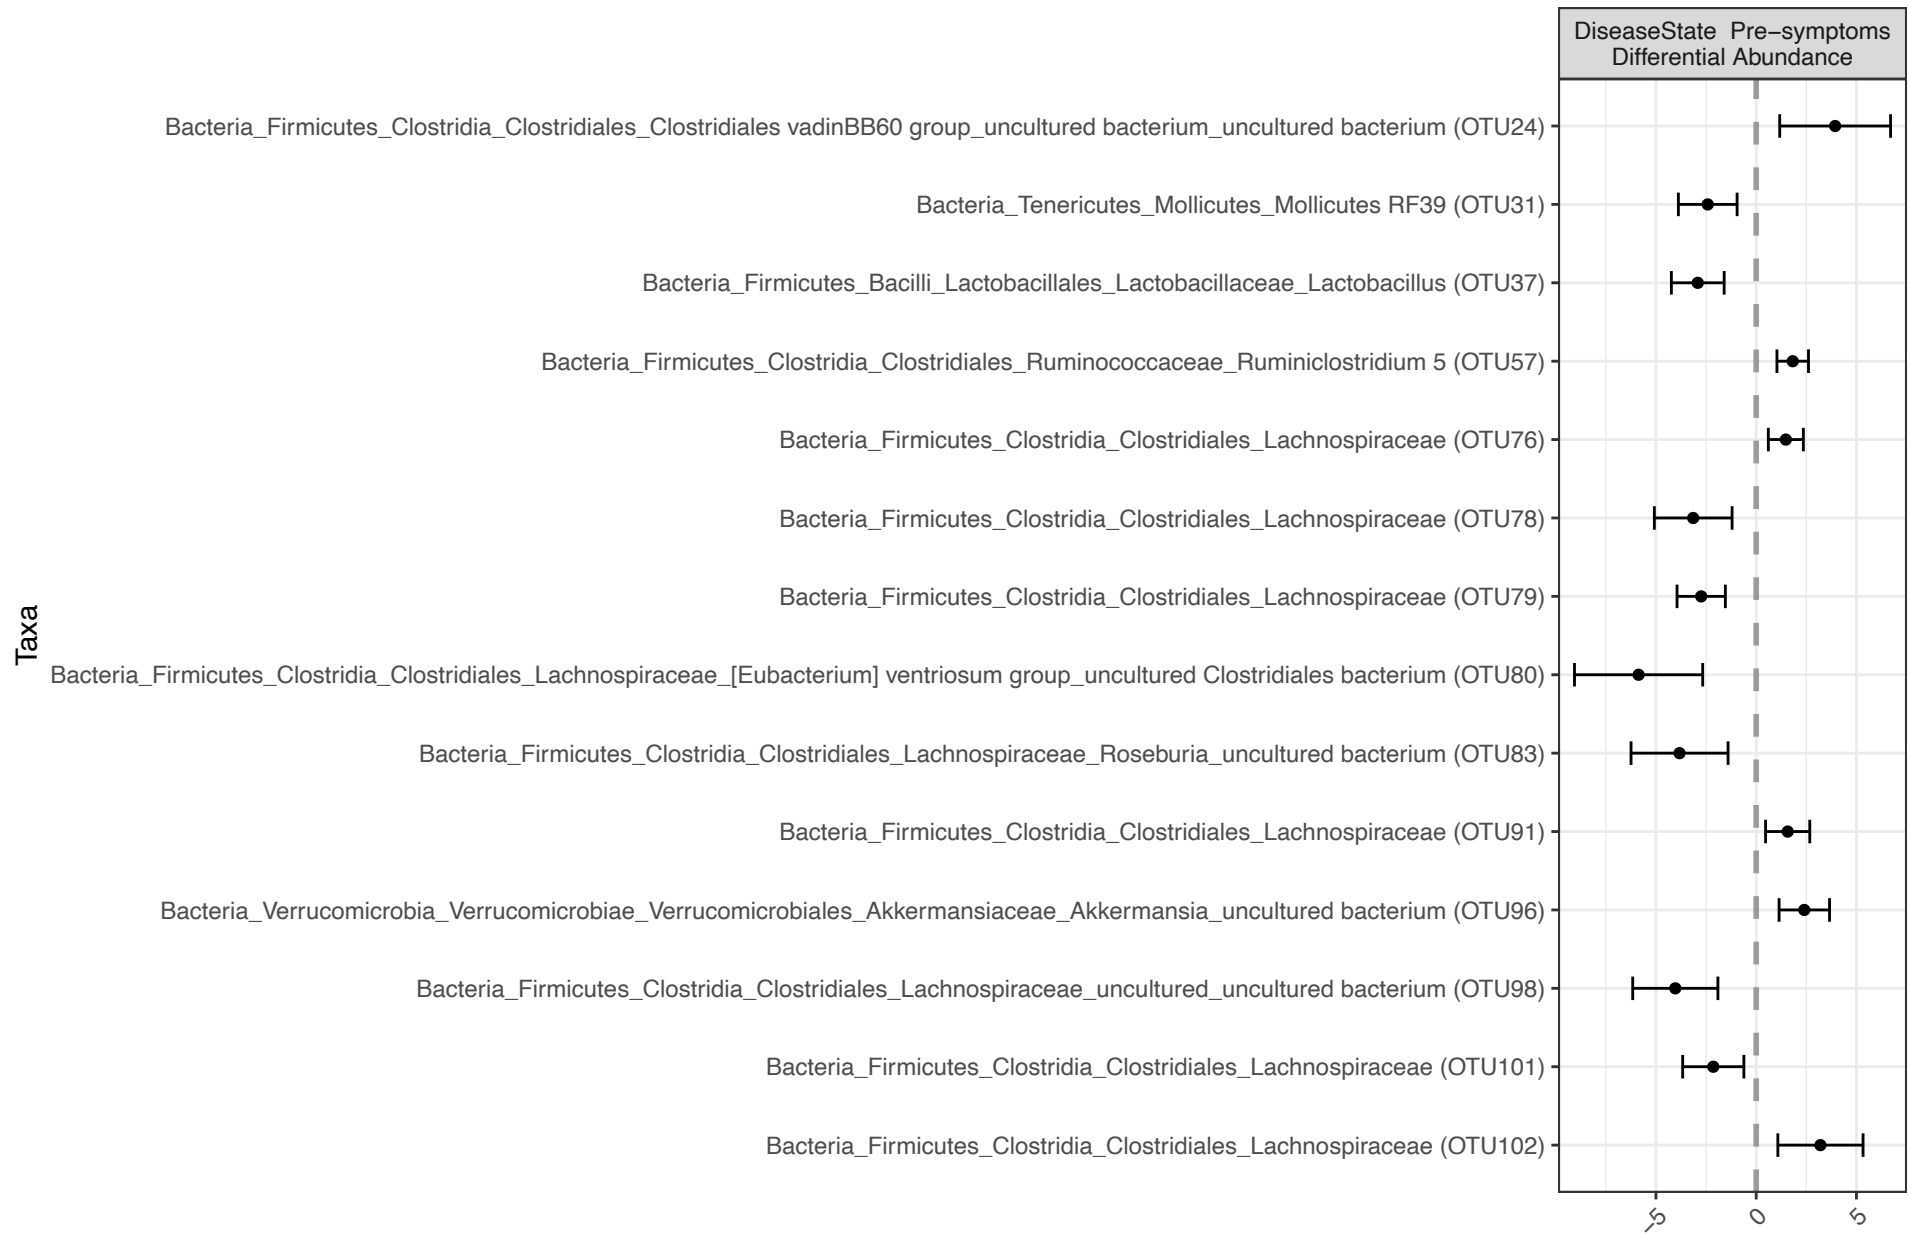

**D**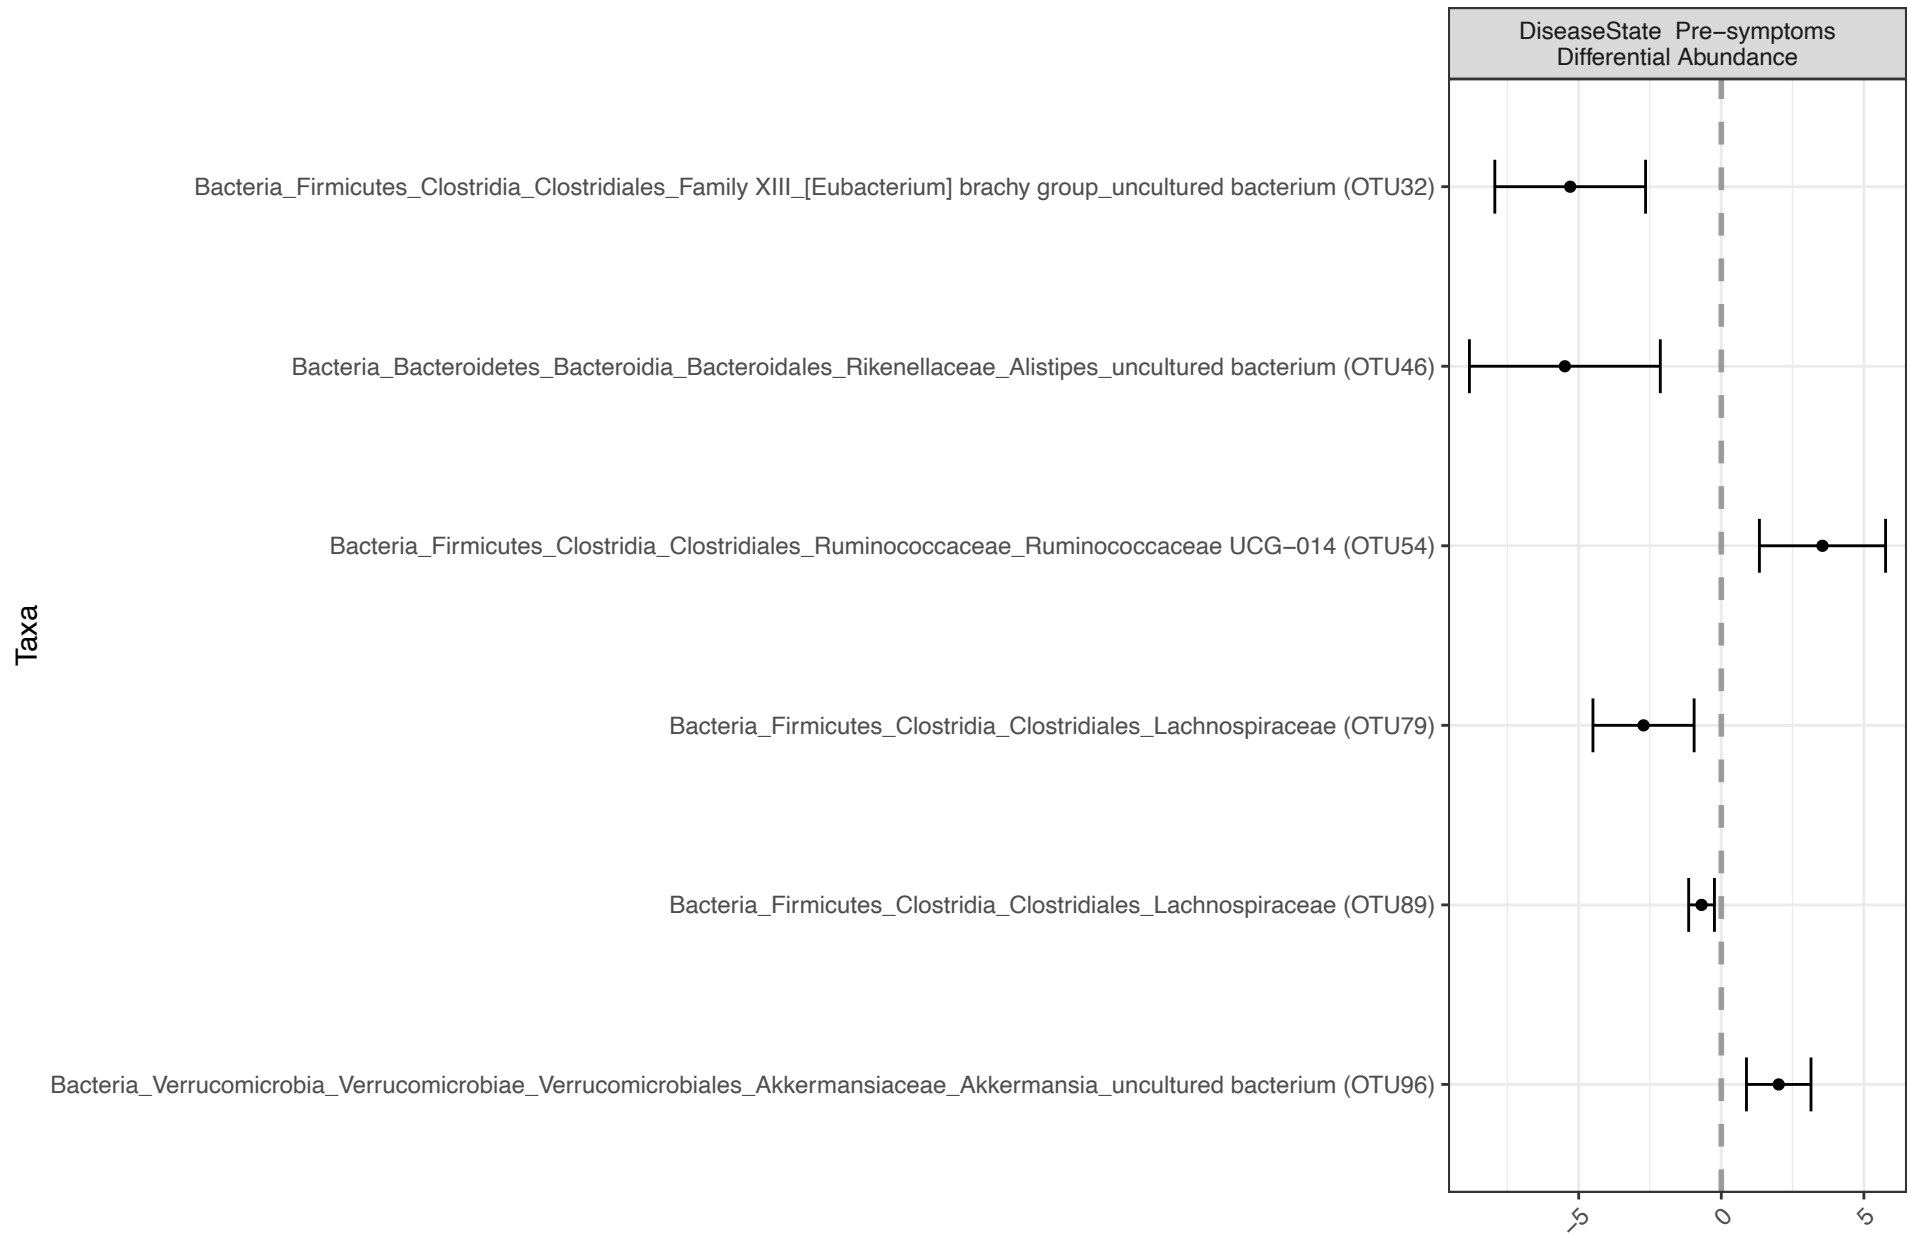

E

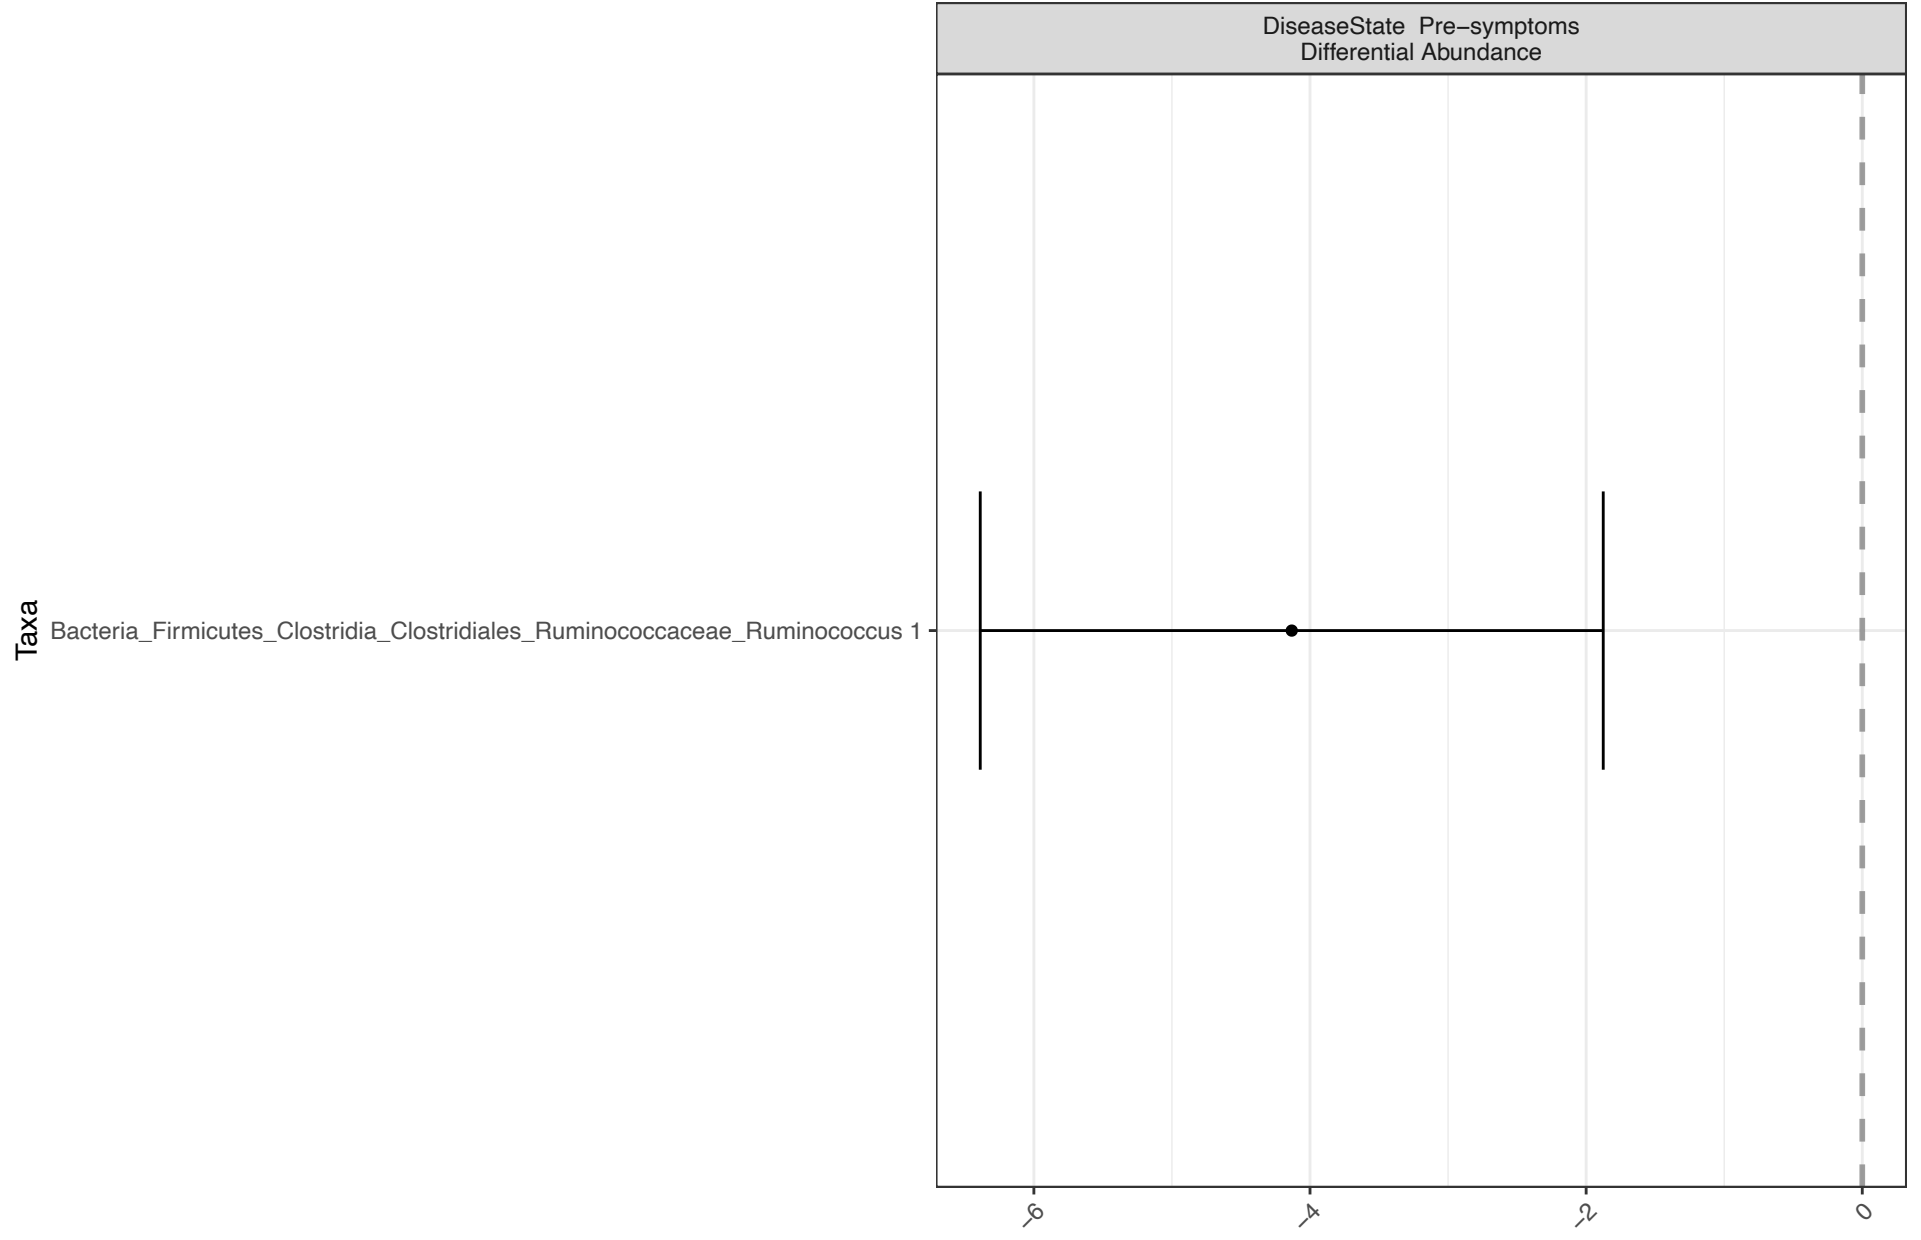

Supplement: msystems.00507-21-sf003.pdf [file msystems.00507-21-sf003.pdf]
