# Supplementary material for: Changes in Gut Bacterial Translation Occur before Symptom Onset and Dysbiosis in Dextran Sodium Sulfate-Induced Murine Colitis
Source: PubMed Central journal article supplement (PMC8651081; doi:10.1128/msystems.00507-21), 2021-12-07
Supplement: msystems.00507-21-sf004.pdf [file msystems.00507-21-sf004.pdf]

**A**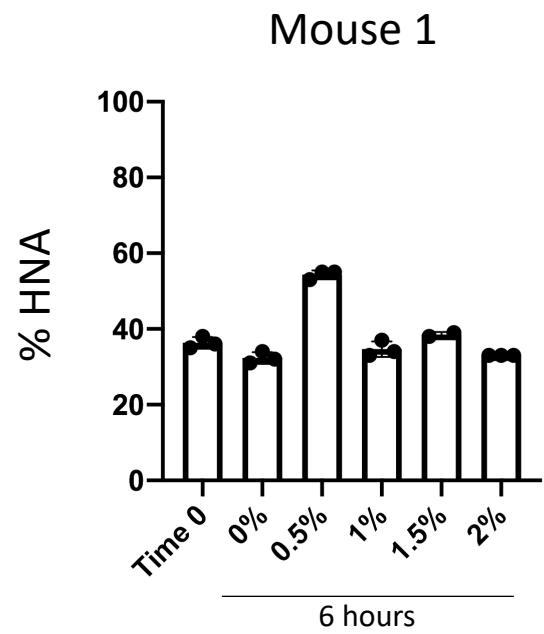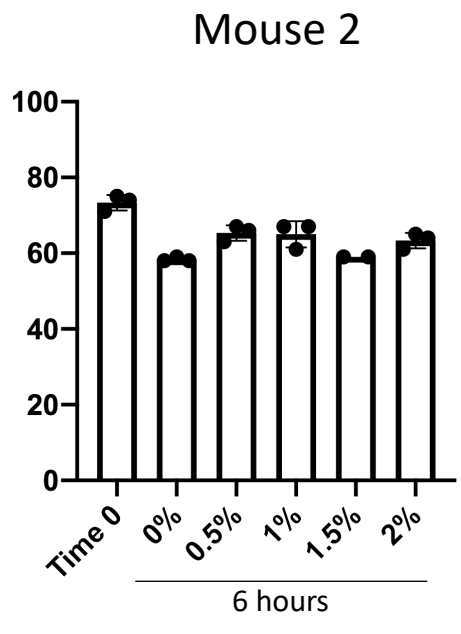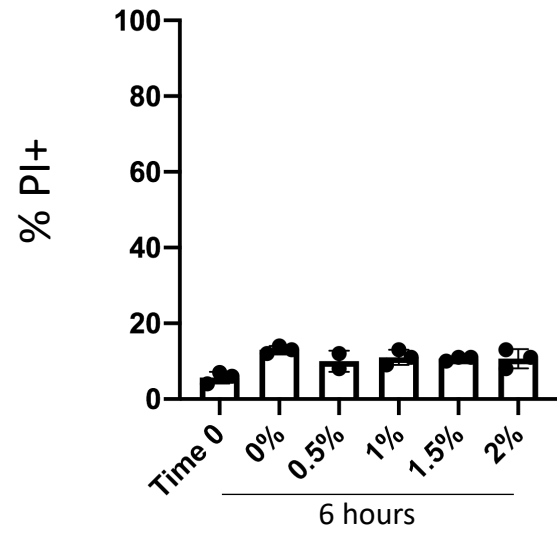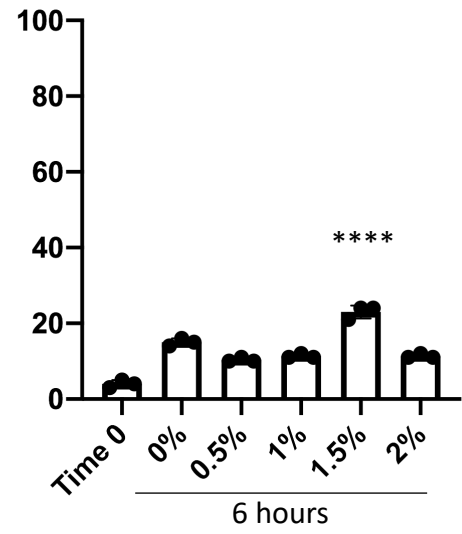**B**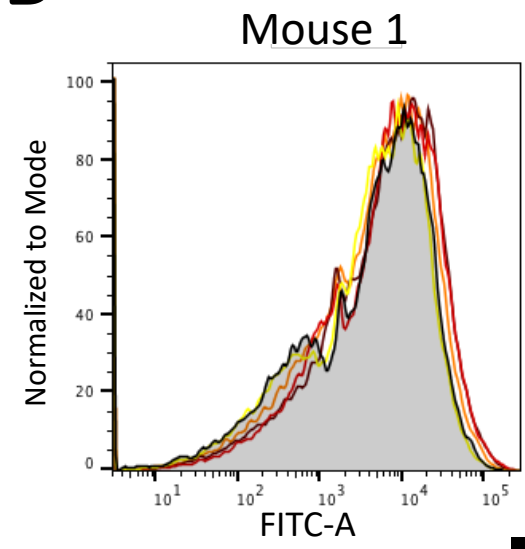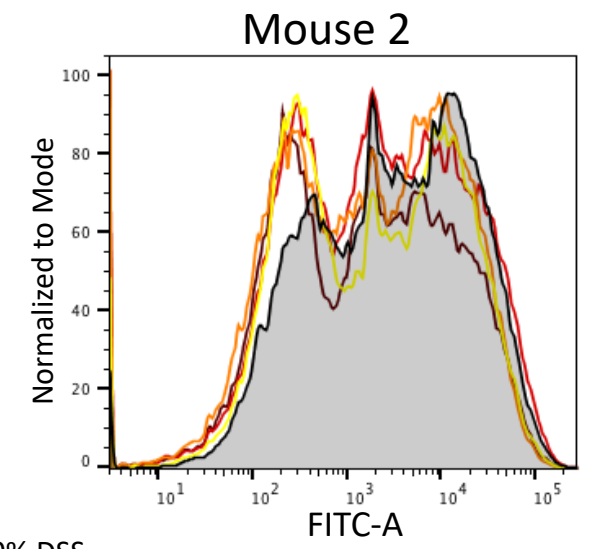

- 0% DSS
- 0.5% DSS
- 1.0% DSS
- 1.5% DSS
- 2.0% DSS
